# Supplementary material for: Comparisons of eccentric knee flexor strength and asymmetries across elite, sub-elite and school level cricket players
Source: PeerJ. 2016 Feb 18;4:e1594. doi: 10.7717/peerj.1594 (PMC4768700; doi:10.7717/peerj.1594)
Supplement: Data S1 [file peerj-04-1594-s001.xlsx]

## Sheet: Sheet1
Player No.	Age	Height (cm)	Weight (kg)	Group	Playing Position	Front Leg	Throwing Arm
								Rep 1		Rep 2		Rep 3
								Left	Right	Left	Right	Left	Right
1	19	195.5	93.7	1	Bowler	Left	Right	312.116	317.651	290.246	287.65	287.413	274.955
2	24	172.5	79.1	1	Bowler	Left	Right	311.44	373.12	359.998	389.362	328.927	371.614
3	23	196.5	99.7	1	Bowler	Left	Right	308.882	385.743	282.292	350.65	308.548	403.654
4	23	189	80.6	1	Batsman	Right	Right	205.452	258.138	260.055	285.91	210.518	241.423
5	25	197.5	95.2	1	Bowler	Left	Right	351.073	413.989	363.07	436.449	344.284	399.243
6	28	203	90	1	Bowler	Left	right	278.177	333.243	244.625	297.718	250.946	272.032
7	32	170	75.3	1	Wicketkeeper/Batsman	Right	Right	338.836	320.724	267.844	290.689	235.201	267.977
8	35	179.5	92.1	1	Allrounder	Left	Right	214.099	235.499	184.889	202.685	189.843	224.038
9	24	182.5	77.9	1	Batter	Right	Left	366.406	465.716	366.086	481.452	363.908	468.951
10	22	180.5	86.5	1	Bowler	Left	Right	340.275	377.235	289.867	326.409	367.381	416.019
11	21	195	101.7	1	Bowler	Left	Right	319.703	347.411	292.74	308.296	307.159	335.978
12	25	183	82	1	Bowler	Left	Right	409.634	428.738	403.294	424.92	414.063	412.023
13	21	180	81.9	1	Wicketkeeper/Batsman	Left	Right	399.351	409.176	272.016	365.737	284.906	305.159
14	29	179.5	84.6	1	Batsman	Right	Right	239.497	250.384	157.632	165.422	151.674	140.919
15	20	183	78.6	1	Batsman	Left	Right	330.418	307.474	296.459	273.882	326.549	311.367
16	21	192	86	1	Bowler	Left	Right	249.534	242.436	282.92	283.004	306.994	298.943
17	16	181	82	2	Bowler	Right	Left	296.06	278.553	301.652	282.312	301.633	296.637
18	16	191	73	2	Batter	Left	Right	319.11	288.731	324.075	304.458	296.687	280.766
19	18	181	80	2	Bowler	Left	Right	174.744	251.55	196.66	272.936	172.854	234.547
20	15	180	56	2	Batter	Left	Right	308.785	290.589	297.453	257.336	284.987	246.482
21	17	176	80	2	Bat/bowl	Left	Right	380.816	375.695	342.752	372.815	352.136	389.268
22	17	179	67	2	Bat/bowl	Left	Right	223.189	294.213	256.756	310.708	270.453	327.128
23	15	165	55	2	Batter	Left	Right	181.48	175.288	156.344	148.293	162.379	157.508
24	14	173	50	2	Batter	Left	Right	196.484	198.135	152.653	165.422	194.722	190.93
25	16	183	59	2	Bowler	Left	Right	159.15	137.962	177.603	174.015	155.136	145.521
26	15	190	85	2	bat	Left	Right	202.231	258.937	248.199	324.784	156.349	210.987
27	17	193	65	2	Bat	Left	Right	265.16	295.845	268.387	308.924	271.428	322.713
28	15	181	65	2	Bowl	Right	Left	284.412	392.514	268.966	415.104	282.234	378.848
29	15	183	75	2	Bat	Left	Right	298.613	261.273	331.799	269.685	308.311	260.744
30	14	183	76	2	Bat/Bowl	Right	Left	283.919	343.992	295.52	374.248	252.214	346.946
31	15	165	57	2	Bat/Bowl	Left	Right	210.813	237.681	224.256	254.881	220.162	234.943
32	15	182	65	2	All Round	Left	Right	204.457	252.152	252.026	271.813	284.644	265.959
33	14	181	65	2	Bat/Bowl	Left	Right	250.566	257.359	256.339	247.825	239.539	240.85
34	16	185	77	2	Bowl	Left	Right	354.925	409.032	355.853	394.62	365.693	365.815
35	16	173	57	2	Bat/Bowl	Right	Right	282.868	358.772	281.088	357.3	319.1	362.892
36	16	183	78	2	Bat	Right	Right	426.961	411.013	400.797	378.318	405.062	357.159
37	17	188	91	2	Bat/WK	Left	Right	451.69	424.749	407.202	375.733	376.392	362.33
38	16	186	78	2	Bat	Left	Right	358.847	391.389	369.785	371.406	359.188	371.163
39	15	171	57	2	Bowl	Left	Right	245.017	235.468	248.038	200.07	263.057	233.73
40	15	173	65	2	Bat	Left	Right	281.684	305.619	257.025	239.505	245.803	239.73
41	16	178	63	2	Bat/Bowl	Left	Right	226.072	238.947	250.501	258.239	241.372	246.874
42	16		83	2	Bowl	Right	Left	389.576	369.009	305.392	349.6	290.035	359.197
43	21	189	82	3	Bowler	left	right	297.051	300.585	237.486	282.921	344.189	340.228
44	18	186	87	3	Bowler	left	right	453.442	411.451	430.369	373.111	393.008	340.719
45	16	186	58	3	Bat/Bowl	left	right	164.93	177.377	174.231	190.329	297.017	193.501
46	16	180	80	3	Bowler	left	right	383.502	473.343	400.784	443.108	375.997	427.313
47	17	182	82	3	Batter	left	right	364.407	374.465	393.517	397.12	378.962	385.793
48	16	181	72	3	Batter	right	left	322.92	397.125	325.992	358.257	311.918	366.941
49	25	187	100	3	Bat/Bowl	left	right	318.024	350.126	289.086	346.082	309.846	358.408
50	21	175	70	3	Batter	left	right	227.414	262.499	209.787	224.439	217.563	230.107
51	21	179	70	3	Batter	left	right	366.072	400.969	323.027	375.556	360.823	382.518
52	18	187	80	3	Bat/Bowl	left	right	280.31	334.991	322.691	332.436	297.075	342.512
53	18	192	90	3	Bowler	left	right	301.258	332.579	268.665	326.6	263.305	334.687
54	18	187	90	3	Bowler	left	right	319.131	305.89	326.341	380.886	342.204	408.397
55	18	180	72	3	Batter	left	right	345.567	322.53	342.917	333.291	282.623	245.097
56	33	182	93	3	Batter	right	left	371.387	378.111	360.888	371.022	323.552	315.466
57	21	188	77	3	Bat/Bowl	left	right	160.607	184.288	119.006	165.042	149.993	197.215
58	29	185	90	3	Bowler	Left	Right	198.911	237.89	207.597	232.162	237.937	232.137
59	26	177	74	3	Bat/Bowl	right	left	374.796	524.503	412.9	481.466	421.492	514.798
60	26	189	85	3	Batter	left	right	332.952	378.915	380.441	388.694	355.869	400.386
61	25	193	102	3	Bowler	left	right	437.292	467.341	474.102	449.308	466.794	437.61
62	22	201	87	3	Bowler	left	right	172.491	177.588	149.505	172.331	160.326	179.369
63	25	192	94	3	Batter	left	right	299	368.684	348.677	382.846	310.875	344.623
64	19	173	93	3	Keep/Bat	left	right	266.203	285.937	283.002	287.503	298.288	327.176
65	22	191	98	3	Bowler	left	left	253.949	236.453	245.257	232.708	207.845	207.771
66	19	183	92	3	Batter	right	right	244.223	220.307	350.976	296.118	329.685	240.497
67	29	188	95	3	Batter	right	right	328.079	487.207	274.537	401.616	319.362	422.462
68	18	192	83	3	Batter	left	right	296.705	275.671	353.73	317.196	342.839	302.566
69	20	180	76	3	Batter	left	right	233.765	328.979	215.761	336.555	191.999	326.644
70	20	178	74	3	Batter	right	right	287.246	350.256	330.569	339.992	301.971	355.541
71	21	183	77	3	Bowler	left	right	194.807	232.727	206.279	228.722	214.832	211.035
72	23	186	78	3	Bowler	left	right	177.179	187.707	184.397	234.999	221.517	218.593
73	22	171	72	3	Keep/Bat	left	right	229.725	314.556	240.042	321.048	285.226	366.711
74	24	170	85	3	Bat/Bowl	right	left	240.298	325.294	223.188	304.113	241.56	334.358
